# Supplementary material for: A new and versatile diamide–diamine donor ligand set in early transition metal chemistry
Source: Royal Society of Chemistry journal article supplement (doi:10.1039/b002455o), 2000-01-01
Supplement: b002455o.doc [file b002455o.doc]

**A new and versatile diamide-diamine donor ligand set in early transition metal chemistry**

**Michael E G Skinner, David A Cowhig, and Philip Mountford***

*Inorganic Chemistry Laboratory, South Parks Road, Oxford OX1 3QR, UK*

_______________________________________________________________________________________________

**Electronic Supplementary Information**

_______________________________________________________________________________________________

**H2N2NN' 2-H2 [N2NN' = (2-NC5H4)CH2N(CH2CH2NSiMe3)2]**

To a solution of (2-NC5H4)CH2N(CH2CH2NH2)2 (5.4 g, 27.8 mmol) and Et3N (11.3 g, 15.6 ml, 112 mmol) in THF (200 ml) cooled to 0 ˚C was added dropwise a solution of ClSiMe3 (6.1 g, 7.1 ml, 56.4 mmol) in THF (40 ml) which resulted in the immediate formation of a white precipitate. The reaction mixture was allowed to warm to room temperature and stirred for a further 2.5 hours. The resulting yellow solution was filtered away from the white solid and the volatiles removed under reduced pressure yielding a yellow oil. The oil was extracted into pentane, filtered and the volatiles removed under reduced pressure to give **2-H2** as a pale yellow oil. Attempts to distil this oil under reduced pressure lead to partial decomposition. Yield: 7.1 g (75%).

**Elemental analysis for C16H34N4Si2**

Found (calculated): C, 56.2 (56.8); H, 9.6 (10.1); N, 17.6 (16.5) %

**1H NMR data (300.1 MHz, 298 K, CDCl3)**

8.50 1 H d 3J = 4.8 Hz 6-C5H4N

7.62 1 H dd 3J = 7.8, 7.5 Hz 4-C5H4N

7.43 1 H d 3J = 7.8 Hz 3-C5H4N

7.13 1 H dd 3J = 7.5, 4.8 Hz 5-C5H4N

3.74 2 H s C5H4NCH2

2.77 4 H m NCH2CH2NSi

2.51 4 H m NCH2CH2NSi

0.75 2 H br s NH

0.01 18 H s Si(CH3)3

**13C-{1H} NMR data (75.5 MHz, 298 K, CDCl3)**

160.5 2-C5H4N

148.9 6-C5H4N

136.2 4-C5H4N

122.9 3-C5H4N

121.8 5-C5H4N

61.0 C5H4NCH2

58.5 NCH2CH2NSi

39.6 NCH2CH2NSi

-0.1 Si(CH3)3

**IR data (NaCl, CH2Cl2)**

3300 (m), 2951 (s), 287 (m), 1590 (m), 1575 (w), 1429 (m), 1399 (m), 1248 (s),

1118 (s), 1040 (m), 933 (m), 836 (s), 753 (m), 682 (w) 670 (w), 655 (w) cm-1.

**EI mass spectrum**

m/z = 338 [M]+ 13 %

m/z = 323 [M-CH3]+ 16 %

m/z = 192 [M-2 SiMe3]+ 22 %

**H2N2NN' 2-Li2**

To a solution of H2N2NN' (7.09 g, 20.9 mmol) in pentane (160 ml) cooled to -78 ˚C was added dropwise a solution of nBuLi in hexanes (2.5 M, 18.4 ml, 46.0 mmol). The mixture was allowed to warm to room temperature and stirred for a further 4 hours after which time it was filtered away from a white solid. The solid was washed with pentane (3 x 20 ml) and dried under reduced pressure to give **2-Li2** as a white solid. Yield: 4.2 g (57 %).

**Elemental analysis for C16H32Li2N4Si2**

Found (calculated): C, 54.3 (54.8); H, 9.3 (9.2); N, 15.4 (16.0) %

**1H NMR data (300.1 MHz, 298 K, C6D6)**

8.27 1 H br s 6-C5H4N

6.88 1 H br t 4-C5H4N

6.50 1 H br m 5-C5H4N

6.47 1 H br s 3-C5H4N

3.39 2 H br s NCH2CH2NSi

3.37 2 H br s C5H4NCH2

3.29 2 H br s NCH2CH2NSi

2.75 2 H br s NCH2CH2NSi

2.34 2 H brs NCH2CH2NSi

0.32 18 H s Si(CH3)3

**13C-{1H} NMR data (75.5 MHz, 298 K, C6D6)**

160.7 2-C5H4N

149.3 6-C5H4N

137.1 4-C5H4N

122.6 3-C5H4N

122.5 5-C5H4N

58.7 NCH2CH2NSi

58.5 C5H4NCH2

45.0 NCH2CH2NSi

2.9 Si(CH3)3

**IR data (KBr plates , Nujol)**

1600 (s), 1571 (m), 1305 (w), 1247 (m), 1151 (w), 1083 (m), 1007 (w), 939 (w),

832 (m), 670 (w), 583 (w), 461 (w) cm-1.

**EI mass spectrum**

m/z = 323 [M - 2 Li, Me]+ 7 %

m/z = 236 [M+ - 2 Li, Me, SiMe3] 92 %

**H2O2NN' 3-H2** **[O2NN' = (2-NC5H4)CH2N(CH2C(Me)2O)2]**

2-(Aminomethyl)-pyridine (2.50 g, 23.1 mmol) was added dropwise to isobutylene oxide (4.92 g, 68.3 mmol) with stirring in a thick-walled Rotaflo ampoule. A catalytic amount of ethanol (1 ml) was added to the resulting yellow solution, which was frozen using liquid nitrogen and the headspace evacuated. The solution was stirred at 75 oC for 5 days to produce a dark brown solution. The volatiles were removed under reduced pressure to leave a dark brown solid which was identified by 1H NMR spectroscopy as crude H2O2NN'. The crude product was dried over CaH2 (ca. 5 g) in THF (ca. 30 ml) for 16 h. Crude yield: 3.50 g (60 %). The crude product was sublimed (80 oC, 3 x 10-6 mbar) to give H2O2NN' **3-H2** as a yellow solid. Yield: 1.48 g (25 %).

**Elemental analysis for C14H24N2O2**

Found (calculated): C, 66.4 (66.6); H, 9.7 (9.6); N, 10.6 (11.1) %.

**1H NMR data (CDCl3, 300.1 MHz, 298 K)**

8.49 1 H, d, 3J (H6H5) = 3.9 Hz 6-C5H4N

7.59 1 H, ddd, 3J (H4H3) = 7.8 Hz

3J (H4H5) = 7.0 Hz

4J (H4H6) = 1.8 Hz 4-C5H4N

7.18 1 H, d, 3J (H3H4) = 7.8 Hz 3-C5H4N

7.12 1 H, dd, 3J (H5H4) = 7.0 Hz

3J(H5H6) = 3.9 Hz 5-C5H4N

4.43 2 H, s OH

3.99 2 H, s C5H4NCH2

2.71 4 H, s NCH2CMe2

1.08 12 H, s Me

**13C-{1H} NMR data (CDCl3, 125.7 MHz, 298 K)**

159.8 2-C5H4N

149.0 6-C5H4N

136.7 4-C5H4N

123.0 3-C5H4N

122.2 5-C5H4N

70.9 CMe2

69.5 NCH2CMe2

64.6 C5H4NCH2

28.2 Me

**IR data (CsBr plates, Nujol)**

3217 (w), 1591 (w), 1568 (w), 1261 (w), 1200 (w), 1154 (w), 1126 (w), 1101 (m), 1084 (m), 1047 (w), 1023 (w), 995 (w), 972 (w), 935 (w), 907 (w), 855 (w), 800 (w), 766 (w), 723 (w), 645 (w), 622 (w), 583 (w), 488 (w) cm-1.

**CI mass spectrum**

m/z = 253 [M]+ 100 %

m/z = 235 [M - H2O]+21 %

**[Ti(N-2,6-C6H3Pri2)(N2NN')] 4**

To a mixture of solid [Ti(N-2,6-C6H3Pri2)Cl2(py3)] (298 mg, 0.56 mmol) and Li2N2NN' (197 mg, 0.56 mmol) cooled to -78 ˚C was added benzene (10 ml). The mixture was allowed to warm to room temperature and stirred for a further 12 hours. The volatiles were removed under reduced pressure and the resulting orange solid was extraced into CH2Cl2. The orange solution was filtered and the volatiles removed under reduced pressure to yield **4** as a red-orange solid. Yield: 183 mg (58 %).

**Crystal data for 4**: C28H49N5Si2Ti, *M* = 559.80, orthorhombic, Pbcm, *a* = 9.8632(4), *b* = 18.413(1), *c* = 17.507(1) Å, *U* = 3179.4(8) Å3, *Z* = 4, *T* = 170 K,  = 0.36 mm-1, 3688 independent reflections (*R*merge = 0.035), 3240 *I*>3(*I*) used in refinement, final *R* indices: *R* = 0.0574, *R*w = 0.0434.

**Elemental analysis for C28H49N5Si2Ti**

Found (calculated): C, 59.1 (60.1); H, 8.4 (8.8); N, 12.2 (12.5) %

**1H NMR data (500.1 MHz, 298 K, CD2Cl2)**

9.23 1 H d 3J=5.5 Hz 6-C5H4N

7.88 1 H dd 3J=6.5, 7.5 Hz 4-C5H4N

7.38 1 H d 3J=6.5 Hz 3-C5H4N

7.34 1 H dd 3J=5.5, 7.5 Hz 5-C5H4N

7.00 2 H d 3J=7.5 Hz *m*-C6H3

6.70 1 H t 3J=7.5 Hz *p*-C6H3

4.12 2 H m 3J=7.0 Hz CH(CH3)2

4.10 2 H s C5H4NCH2

3.77 2 H m NCH2CH2NSi

3.50 2 H m NCH2CH2NSi

3.10 2 H m NCH2CH2NSi

2.69 2 H m NCH2CH2NSi

1.15 12 H d 3J=7.0 Hz CH(CH3)2

0.22 18 H s Si(CH3)3

**13C-{1H} NMR data (125.7 MHz, 298 K, CD2Cl2)**

159.5 2-C5H4N

154.8 6-C5H4N

143.0 *o*-C6H3

140.6 4-C5H4N

123.7 5-C5H4N

122.8 3-C5H4N

122.8 *m*-C6H3

117.6 *p*-C6H3

59.6 NCH2CH2NSi

59.5 C5H4NCH2

48.3 NCH2CH2NSi

27.5 CH(CH3)2

24.9 CH(CH3)2

2.3 Si(CH3)3

**IR data (KBr plates, Nujol)**

1608 (m), 1417 (m), 1328 (m), 1269 (m), 1241 (m), 1161 (w), 1141 (w), 1069 (w), 1032 (w), 1020 (w), 957 (w), 933 (s), 893 (w), 873 (m), 837 (s), 804 (m), 758 (m), 682 (w), 593 (w), 553 (w) cm-1.

**EI mass spectrum**

m/z = 559 [M]+ 30 %

m/z = 544 [M - CH3]+ 10 %

m/z = 384 [M - (N-2,6-C6H3Pri2)]+ 65 %

**[Ta(NtBu)Cl(N2NN')] 5**

To a green-yellow solution of [Ta(NtBu)Cl3(py)2] (430 mg, 0.83 mmol) in benzene

(20 ml) cooled to 5 ˚C was added a solution of Li2N2NN' (291 mg, 0.83 mmol) in benzene (20 ml). The reaction was allowed to warm to room temperature and stirred for a further 36 hours to give an orange-brown opaque reaction mixture. The volatiles were removed under reduced pressure and the remaining solid was extracted into pentane. The solution was filtered, concentrated to *ca.* 5 ml and cooled to -30 ˚C to give **5** as a brown crystalline solid. Yield: 150 mg (29 %).

**Elemental analysis for C20H41ClN5Si2Ta**

Found (calculated): C, 38.4 (38.5); H, 6.6 (6.6); N, 11.0 (11.2) %

**1H NMR data (500.1 MHz, 298 K, C6D6)**

9.00 1 H d 3J=5.0, Hz 6-C5H4N

6.71 1 H dd 3J=8.0, 7.5 Hz 4-C5H4N

6.34 1 H dd 3J=5.0, 7.5 Hz 5-C5H4N

6.26 1 H d 3J=8.0, Hz 3-C5H4N

4.64 1 H d 2J=15.1 Hz C5H4NCH2

3.86 1 H m NCH2CH2NSi

3.80 1 H m NCH2CH2NSi

3.61 1 H m NCH2CH2NSi

3.35 1 H m NCH2CH2NSi

2.90 1 H d 2J=15.1 Hz C5H4NCH2

2.80 1 H m NCH2CH2NSi

2.29 1 H m NCH2CH2NSi

2.19 1 H m NCH2CH2NSi

1.99 1 H m NCH2CH2NSi

1.74 9 H s C(CH3)3

0.59 9 H s Si(CH3)3

0.32 9 H s Si(CH3)3

**13C-{1H} NMR data (125.7 MHz, 298 K, C6D6)**

160.3 2-C5H4N

150.8 6-C5H4N

137.7 4-C5H4N

122.3 5-C5H4N

121.5 3-C5H4N

65.1 C(CH3)3

64.9 C5H4NCH2

60.5 NCH2CH2NSi

59.8 NCH2CH2NSi

52.2 NCH2CH2NSi

49.1 NCH2CH2NSi

34.1 C(CH3)3

3.4 Si(CH3)3

3.2 Si(CH3)3

**IR data (KBr plates, Nujol)**

1610 (s), 1571 (w), 1355 (m), 1294 (w), 1250 (m), 1212 (w), 1158 (m), 1141 (w), 1132 (w), 1110 (w), 1077 (m), 1055 (w), 1033 (m), 1023 (m), 936 (m), 868 (m),

839 (m), 789 (w), 760 (w), 726 (m), 686 (m), 650 (m), 634 (m), 589 (m), 551 (m), 527 (m), 470 (w) cm-1.

**EI mass spectrum**

m/z = 623 [M]+ 58 %

m/z = 588 [M - Cl]+ 25 %

m/z = 552 [M - tBu]+ 10 %

**[YCl(N2NN')(py)]·1.5(LiCl) 6**

To a mixture of solid YCl3 (271 mg, 1.39 mmol) and Li2N2NN' (486 mg, 1.39 mmol) cooled to -78 ˚C was added pyridine (20 ml). The mixture was allowed to warm to room temperature and stirred for a further 30 minutes before the volatiles were removed under reduced pressure. The resulting red solid was extraced with benzene (3 x 20 ml) and the volatiles of the combined extracts removed under reduced pressure. The remaining orange solid was triturated with pentane and dried to yield **6** as a pink solid. Yield: 590 mg (71 %).

**Elemental analysis for C21H37ClN5Si2·1.5 (LiCl)**

Found (calculated): C, 41.4 (41.8); H, 6.7 (6.2); N, 11.8 (11.6) %

**1H NMR data (500.1 MHz, 298 K, C6D6)**

9.85 1 H d 3J=4.5 Hz 6-C5H4N

8.99 2 H br s *o*-C5H5N

6.93 1 H m *p*-C5H5N

6.77 1 H dd 3J=7.5, 8.0 Hz 4-C5H4N

6.68 2 H m *m*-C5H5N

6.42 1 H dd 3J=4.5, 8.0 Hz 5-C5H4N

6.36 1 H d 3J=7.5 Hz 3-C5H4N

3.58 2 H m NCH2CH2NSi

3.47 2 H s C5H4NCH2

3.30 2 H m NCH2CH2NSi

2.93 2 H m NCH2CH2NSi

2.36 2 H m NCH2CH2NSi

0.84 18 H s Si(CH3)3

**13C-{1H} NMR data (125.7 MHz, 298 K, C6D6)**

158.9 2-C5H4N

152.9 6-C5H4N

150.9 *o*-C5H5N

138.4 4-C5H4N

137.3 *p*-C5H5N

123.6 5-C5H4N

122.7 *m*-C5H5N

122.4 3-C5H4N

58.4 NCH2CH2NSi

57.1 C5H4NCH2

46.1 NCH2CH2NSi

1.17 Si(CH3)3

**IR data (KBr plates, Nujol)**

1600 (m), 1571 (w), 1307 (w), 1284 (w), 1246 (m), 1152 (w), 1140 (w), 1086 (s), 1058 (w), 1037 (m), 1002 (w), 945 (w), 928 (s), 843 (s), 791 (w), 757 (w), 727 (w), 697 (m), 670 (w), 624 (w), 582 (w), 551 (w) cm-1.

**EI mass spectrum**

m/z = 460 [M - C5H5N]+ 3 %

m/z = 425 [M - C5H5N, Cl]+ 6 %

**[ZrCl2(N2NN')] 7**

To a yellow solution of [ZrCl2(CH2SiMe3)·2Et2O] (2.51 g, 5.17 mmol) in benzene (10 ml) was added a solution of H2N2NN' in benzene (10 ml). The mixture was stirred for 16 hours at room temperature to give an opaque brown mixture. The volatiles were removed under reduced pressure to yield **7** as a pale brown solid. Yield: 2.26 g (87 %).

**Crystal data for 7*·0.5 (C6H6)****:* C16H32Cl2N4Si2Zr·0.5(C6H6), *M* = 537.81, monoclinic, P21/n, *a* = 8.4280(1), *b* = 14.3380(4), *c* = 21.5020(6) Å,  = 93.295(2) o, *U* = 2594.0 Å3, *T* = 150 K,  = 0.73 mm-1, 5550 independent reflections (Rmerge = 0.030), 4506 *I*>3(*I*) used in refinement, final *R* indices: *R* = 0.0278, *R*w = 0.0269.

**Elemental analysis for C16H32Cl2N4Si2Zr**

Found (calculated): C, 38.7 (38.5); H, 6.8 (6.5); N, 11.2 (11.2) %

**1H NMR data (500.0 MHz, 298 K, C6D6)**

9.00 1 H d 3J=5.5 Hz 6-C5H4N

6.94 1 H dd 3J=7.5, 7.5 Hz 4-C5H4N

6.59 1 H d 3J=7.5 Hz 3-C5H4N

6.45 1 H dd 3J=5.5, 7.5 Hz 5-C5H4N

3.72 2 H s C5H4NCH2

3.43 2 H m NCH2CH2NSi

2.99 2 H m NCH2CH2NSi

2.80 2 H m NCH2CH2NSi

2.54 2 H m NCH2CH2NSi

0.42 18 H s Si(CH3)3

**13C-{1H} NMR data (125.7 MHz, 298 K, C6D6)**

157.2 2-C5H4N

148.6 6-C5H4N

138.1 4-C5H4N

122.5 5-C5H4N

121.1 3-C5H4N

62.2 NCH2CH2NSi

61.5 C5H4NCH2

49.5 NCH2CH2NSi

0.5 Si(CH3)3

**IR data (KBr plates, Nujol)**

1608 (m), 1572 (w), 1307 (w), 1246 (s), 1158 (w), 1074 (m), 1018 (m), 937 (m),

907 (s), 839 (s), 784 (m), 750 (m), 727 (m), 682 (m), 647 (w), 581 (w) cm-1.

**[Zr(NMe2)2(N2NN')] 8**

To a solution of [Zr(NMe2)4] (174 mg, 0.65 mmol) in benzene (20 ml) was added to H2N2NN' (220 mg, 0.65 mmol) in benzene (10 ml). The mixture was stirred at room temperature for 16 hours after which time the volatiles were removed under reduced pressure to give an orange solid. The orange solid was extracted into pentane (30 ml), filtered, concentrated to 5 ml and cooled to -30 ˚C yielding **8** as orange crystals. Yield: 185 mg (55 %).

**Elemental analysis for C20H44N6Si2Zr**

Found (calculated): C, 46.2 (46.6); H, 8.4 (8.6); N, 15.6 (16.3) %

**1H NMR data (500.0 MHz, 298 K, C6D6)**

8.67 1 H d 3J=4.5 Hz 6-C5H4N

6.80 1 H dd 3J=7.0, 8.0 Hz 4-C5H4N

6.47 1 H dd 3J=4.5, 8.0 Hz 5-C5H4N

6.29 1 H d 3J=7.0 Hz 3-C5H4N

3.50 2 H m NCH2CH2NSi

3.48 6 H s N(CH3)2

3.26 2 H s C5H4NCH2

3.22 6 H s N(CH3)2

3.05 2 H m NCH2CH2NSi

2.91 2 H m NCH2CH2NSi

2.14 2 H m NCH2CH2NSi

0.19 18 H s Si(CH3)3

**13C-{1H} NMR data (125.7 MHz, 298 K, C6D6)**

158.1 2-C5H4N

150.4 6-C5H4N

137.2 4-C5H4N

122.4 5-C5H4N

122.2 3-C5H4N

59.0 NCH2CH2NSi

58.7 C5H4NCH2

49.2 N(CH3)2

47.0 NCH2CH2NSi

46.1 N(CH3)2

1.5 Si(CH3)3

**IR data (KBr plates, Nujol)**

2760 (s), 2750 (s), 1606 (m), 1573 (w), 1349 (w), 1334 (w), 1307 (w), 1253 (s),

1240 (s), 1155 (w), 1144 (w), 1130 (m), 1083 (m), 1067 (m), 1054 (m), 1041 (m), 1012 (w), 997 (w), 963 (m), 946 (m), 916 (m), 905, (m), 833 (m), 801 (m), 776 (w),

758 (w), 745 (w), 732 (w), 678 (w), 666 (w), 630 (w), 584 (w), 559 (w), 535 (w),

490 (w) cm-1.

**EI mass spectrum**

m/z = 514 [M]+ 42 %

m/z = 454 [M - NMe2]+ 100 %

m/z = 426 [M - 2(NMe2)]+ 67 %

**[ZrCl2(O2NN')] 9**

A solution of H2O2NN' (187 mg, 0.74 mmol) in benzene (20 ml) was added dropwise to [Zr(CH2SiMe3)2Cl2·2Et2O] (360 mg, 0.74 mmol) in benzene (15 ml) with stirring. A yellow precipitate formed immediately and the solution lightened in colour to give a bright yellow suspension and pale supernatant by the end of the addition. After stirring for a further 16 hours, which produced no further colour change, the volatiles were subsequently removed under reduced pressure to leave **9** as a light yellow solid. Yield: 239 mg (78 %).

**Elemental analysis for C14H22Cl2N2O2Zr**

Found (calculated): C, 38.8 (40.8); H, 5.1 (5.4); N, 5.4 (6.8) %.

**1H NMR data (C6D6, 499.9 MHz, 298 K):**

9.11 1 H, d, 3J (H6H5) = 6.1 Hz 6-C5H4N

6.66 1 H, dd, 3J (H4H3) = 7.8 Hz

3J (H4H5) = 6.8 Hz 4-C5H4N

6.15 1 H, dd, 3J (H5H4) = 6.8 Hz

3J (H5H6) = 6.1 Hz 5-C5H4N

6.05 1 H, d, 3J (H3H4) = 7.8 Hz 3-C5H4N

3.65 2 H, s C5H4NCH2

3.04 2 H, d, 2J = 12.8 Hz NCHHCMe2

2.41 2 H, d, 2J = 12.8 Hz NCHHCMe2

1.31 6 H, s CMeMe

0.69 6 H, s CMeMe

The compound **9** is only sparingly soluble in C6D6 (and CD2Cl2). Hence, it was not possible to obtain 13C NMR data.

**IR data (CsBr plates, Nujol)**

1608 (w), 1572 (w), 1296 (w), 1261 (w), 1207 (w), 1174 (m), 1158 (m), 1079 (m), 1059 (w), 1019 (m), 983 (m), 948 (w), 801 (w), 767 (w), 723 (w), 684 (w), 641 (w), 617 (w), 580 (w), 543 (w), 483 (w) cm-1

**[Zr(NMe2)2(O2NN')] 10**

A solution of H2O2NN' (220 mg, 0.87 mmol) in benzene (20 ml) was added dropwise to [Zr(NMe2)4] (233 mg, 0.87 mmol) in benzene (15 ml) with stirring and cooling using an ice-water bath. This produced an immediate darkening in colour to give a bright orange solution by the end of the addition. The solution was stirred at room temperature for *ca*. 30 minutes, which produced no further colour change, and the volatiles subsequently removed under reduced pressure to leave a red solid. This was recrystallised from pentane to give **10** as an orange solid. Yield: 129 mg (34 %).

**Elemental analysis for C18H34N4O2Zr**

Found (calculated): C, 49.4 (50.3); H, 7.8 (8.0); N, 11.8 (13.0) %.

**1H NMR data (C6D6, 499.9 MHz, 298 K)**

8.61 1 H, d, 3J (H6H5) = 5.5 Hz 6-C5H4N

6.82 1 H, dd, 3J (H4H3) = 8.4 Hz

3J (H4H5) = 7.7 Hz 4-C5H4N

6.46 1 H, dd, 3J (H5H4) = 7.7 Hz

3J(H5H6) = 5.5 Hz 5-C5H4N

6.21 1 H, d, 3J (H3H4) = 8.4 Hz 3-C5H4N

3.74 2 H, s C5H4NCH2

3.68 6 H, s NMe2 *cis* or *trans* to C5H4N

3.40 6 H, s NMe2 *trans* or *cis* to C5H4N

2.89 2 H, d, 2J = 12.3 Hz NCHHCMe2

2.53 2 H, d, 2J = 12.3 Hz NCHHCMe2

1.32 6 H, s CMeMe

0.79 6 H, s CMeMe

**13C-{1H} NMR data (C6D6, 125.7 MHz, 298 K):**

160.1 2-C5H4N

151.3 6-C5H4N

137.7 4-C5H4N

122.7 5-C5H4N

119.9 3-C5H4N

79.5 CMe2

76.2 NCH2CMe2

65.9 C5H4NCH2

47.9 NMe2 *cis* or *trans* to C5H4N

43.9 NMe2 *trans* or *cis* to C5H4N

32.6 CMeMe

29.0 CMeMe

**IR data (CsBr plates, Nujol)**

2746 (m), 1632 (w), 1602 (w), 1572 (w), 1300 (w), 1286 (w), 1261 (w), 1238 (w), 1221 (w), 1202 (w), 1182 (m), 1160 (m), 1129 (w), 1091 (m), 1051 (w), 1013 (w), 996 (m), 981 (m), 953 (m), 902 (w), 846 (w), 816 (w), 799 (w), 767 (m), 725 (m), 682 (w), 634 (w), 611 (w), 585 (w), 556 (m), 521 (w) cm-1.

**[Zr(CH2Ph)Cl(N2NN')] 11**

To a solution of [ZrCl2(N2NN')] (500 mg, 1.00 mmol) in benzene (30 ml) cooled to 5 ˚C was added dropwise a solution of PhCH2ClMg (1.0 M in Et2O , 1.0 ml, 1.0 mmol) in benzene (5 ml). The mixture turned slightly orange and was allowed to warm to room temperature before being stirred for a further 16 hours. The volatiles were removed under reduced pressure and the resulting yellow solid extracted into benzene (60 ml). The yellow soltion was filtered and the volatiles removed under reduced pressure to give **11** as yellow solid. Yield: 486 mg (87 %).

**Elemental analysis for C23H39N6Si2Zr**

Found (calculated): C, 48.6 (49.8); H, 6.8 (7.1); N, 10.1 (10.1) %

**1H NMR data (500.0 MHz, 298 K, C6D6)**

9.26 1 H d 3J=5.0 Hz 6-C5H4N

7.28 4 H m *o, m*-C6H5

6.84 1 H t 3J=6.5 Hz *p*-C6H5

6.72 1 H dd 3J=7.5, 7.5 Hz 4-C5H4N

6.37 1 H dd 3J=5.0, 7.5 Hz 5-C5H4N

6.20 1 H d 3J=7.5 Hz 3-C5H4N

3.33 2 H s C6H5CH2

3.32 2 H m NCH2CH2NSi

3.03 2 H s C5H4NCH2

2.90 2 H m NCH2CH2NSi

2.15 2 H m NCH2CH2NSi

2.09 2 H m NCH2CH2NSi

0.32 18 H s Si(CH3)3

**13C-{1H} NMR data (125.7 MHz, 298 K, C6D6)**

157.5 2-C5H4N

151.4 1-C6H5

150.5 6-C5H4N

138.4 4-C5H4N

129.3 *o* or *m*-C6H5

128.3 *o* or *m*-C6H5

122.9 5-C5H4N

121.5 3-C5H4N

118.7 *p*-C6H5

64.7 C6H5CH2

57.5 C5H4NCH2

57.2 NCH2CH2NSi

48.7 NCH2CH2NSi

2.1 Si(CH3)3

**IR data (KBr plates, Nujol)**

1604 (m), 1589 (m), 1570 (w), 1300 (w), 1206 (m), 1175 (w), 1157 (w), 1083 (s), 1015 (m), 946 (s), 925 (w), 902 (s), 873 (w), 839 (s), 799 (m), 790 (m), 747 (m),

730 (w), 694 (m), 679 (w), 648 (w), 633 (w), 594 (m), 579 (m) cm-1.

**EI mass spectrum**

m/z = 552 [M]+ 5 %

m/z = 517 [M - Cl]+ 21 %

m/z = 461 [M - PhCH2]+ 35 %

**[ZrMe2(N2NN')] 12**

To a solution of [ZrCl2(N2NN')] (490 mg, 0.98 mmol) in benzene (20 ml) was added dropwise a solution of MeLi (1.6 M in Et2O, 0.62 ml, 0.98 mmol) in benzene (5 ml). After stirring for 16 hours another equivalent of MeLi (1.4 M in Et2O, 0.7ml, 0.99 mmol) in benzene (5 ml) was added dropwise. The reaction mixture was stirred for a further 4 hours after which time the volatiles were removed under reduced pressure to give a light brown solid. The solid was extracted into pentane (3 x 15ml), filtered and the combined extracts concentrated to 5 ml. Cooling to -30 ˚C produced **12** as a white solid which was washed with cold pentane and dried under reduced pressure. Yield: 397 mg (88 %).

**Elemental analysis for C18H38N4Si2Zr**

Found (calculated): C, 46.0 (47.2); H, 8.3 (8.4); N, 11.7 (12.2) %

**1H NMR data (500.0 MHz, 298 K, C6D6)**

8.59 1 H d 3J=5.0 Hz 6-C5H4N

6.77 1 H dd 3J=8.0, 7.0 Hz 4-C5H4N

6.38 1 H dd 3J=5.0, 7.0 Hz 5-C5H4N

6.31 1 H d 3J=8.0 Hz 3-C5H4N

3.43 2 H m NCH2CH2NSi

3.29 2 H s C5H4NCH2

3.09 2 H m NCH2CH2NSi

2.54 2 H m NCH2CH2NSi

2.09 2 H m NCH2CH2NSi

0.79 3 H s ZrCH3

0.70 3 H s ZrCH3

0.36 18 H s Si(CH3)3

**13C-{1H} NMR data (125.7 MHz, 298 K, C6D6)**

158.5 2-C5H4N

150.1 6-C5H4N

137.8 4-C5H4N

122.9 5-C5H4N

121.8 3-C5H4N

58.3 C5H4NCH2

57.9 NCH2CH2NSi

48.0 NCH2CH2NSi

41.8 ZrCH3

36.4 ZrCH3

1.3 Si(CH3)3

**IR data (KBr plates, Nujol)**

1604 (m), 1572 (w), 1303 (w), 1280 (w), 1243 (s), 1154 (w), 1074 (s), 1035 (w),

1008 (w), 942 (m), 916 (m), 834 (s), 804 (m), 757 (m), 731 (w), 678 (w), 594 (w), 560 (w), 535 (w), 484 (w) cm-1.

**EI mass spectrum**

m/z = 441 [M - CH3]+ 32 %

m/z = 426 [M - 2 CH3]+ 100 %

**{[Zr{(2-NC5H4)CH2N(CH2CH2NSiMe3)CH2CH2NSi(Me)2CH2}][MeB(ArF)3]} 13**

To a solution of [ZrMe2(N2NN')] (187 mg, 0.41 mmol) in benzene (5 ml) was added B(ArF)3 in benzene (5 ml) resulting in the immediate formation of a red oil. This oil was isolated, washed with benzene (3 x 5 ml) and dried *in vacuuo* to yield **12** as a white solid. Yield: 235 mg (60 %).

**Elemental analysis for C35H34BF15N4Si2Zr**

Found (calculated): C, 44.7 (44.1); H, 3.6 (4.0); N, 5.7 (5.9) %

**1H NMR data (500.1 MHz, 298 K, CD2Cl2)**

9.20 1 H d 3J=6.0 Hz 6-C5H4N

8.24 1 H dd 3J=8.0, 7.5 Hz 4-C5H4N

7.76 1 H dd 3J=7.5, 6.0 Hz 5-C5H4N

7.69 1 H d 3J=8.0 Hz 3-C5H4N

4.32 2 H s C5H4NCH2

3.93 1 H m NCH2CH2NSi

3.79 1 H m NCH2CH2NSi

3.79 1 H m NCH2CH2NSi

3.61 1 H m NCH2CH2NSi

3.54 1 H m NCH2CH2NSi

3.32 1 H m NCH2CH2NSi

3.24 1 H m NCH2CH2NSi

3.02 1 H m NCH2CH2NSi

1.39 1 H d 3J=15.5 Hz ZrCH2

1.10 1 H d 3J=15.5 Hz ZrCH2

0.44 3 H br s BCH3

0.43 3 H s SiCH3

0.00 3 H s SiCH3

-0.02 9 H s Si(CH3)3

**13C-{1H} NMR data (125.7 MHz, 298 K, CD2Cl2)**

159.3 2-C5H4N

152.5 6-C5H4N

148.7 *o,m* or *p-*C6F5 1J=234 Hz

143.7 4-C5H4N

137.8 *o,m* or *p-*C6F5 1J=248 Hz

136.8 *o,m* or *p-*C6F5 1J=264 Hz

126.2 5-C5H4N

124.8 3-C5H4N

60.0 NCH2CH2NSi

59.5 ZrCH2

58.7 C5H4NCH2

56.1 NCH2CH2NSi

52.6 NCH2CH2NSi

45.0 NCH2CH2NSi

7.6 SiCH3

3.2 SiCH3

0.8 Si(CH3)3

**19F NMR data (470.4 MHz, 298 K, CD2Cl2)**

-133.4 6 F d 3J=21.4 Hz *o*-C6F5

-165.2 3 F t 3J=21.4 Hz *p*-C6F5

-167.9 6 F dd 3J=21.4 Hz *m*-C6F5

**11B NMR data** **(160.4 MHz, 298 K, CD2Cl2)**

-14.73 B(C6F5)3

**IR data (KBr plates, Nujol)**

1641 (m), 1610 (m), 1510 (s), 1304 (w), 1260 (m), 1086 (s), 1054 (w), 1040 (w),

1018 (w), 995 (w), 979 (w), 966 (w), 952 (w), 936 (w), 922 (w), 876 (w), 840 (s),

766 (w), 748 (w), 724 (w), 685 (w), 660 (w), 647 (w), 619 (w), 604 (w), 588 (w),

570 (w), 541 (w), 522 (w), 474 (w), 430 (w) cm-1.

**{[ZrCl(N2NN')][PhCH2B(ArF)3]} 14**

To a soltion of [Zr(PhCH2)Cl(N2NN')] (150 mg, 0.27 mmol) in benzene (5 ml) was added dropwise a solution of B(ArF)3 (139 mg, 0.27 mmol) in benzene (5 ml) resulting in the immediate formation of an orange oil. The oil was isolated, washed with benzene (3 x 5 ml) and dried *in vacuuo* to yield **14** a white solid. Yield: 176 mg (61 %).

**Elemental analysis for C41H39BClF15N4Si2Zr**

Found (calculated): C, 46.0 (46.2); H, 3.8 (3.7); N, 5.3 (5.3) %

**1H NMR data (500.1 MHz, 298 K, CD2Cl2)**

9.19 1 H d 3J=5.5 Hz 6-C5H4N

8.16 1 H dd 3J=8.5, 7.5 Hz 4-C5H4N

7.66 1 H dd 3J=8.5, 5.5 Hz 5-C5H4N

7.57 1 H d 3J=7.5 Hz 3-C5H4N

6.97 2 H dd 3J=7.0, 7.5 Hz *m*-C6H5

6.87 1 H t 3J=7.5 Hz *p*-C6H5

6.84 2 H d 3J=7.0 Hz *o*-C6H5

4.20 2 H s C5H4NCH2

3.91 2 H m NCH2CH2NSi

3.60 2 H m NCH2CH2NSi

3.50 2 H m NCH2CH2NSi

3.01 2 H m NCH2CH2NSi

2.89 2 H br s C6H5CH2

0.27 18 H s Si(CH3)3

**13C-{1H} NMR data (125.7 MHz, 298 K, CD2Cl2)**

159.2 2-C5H4N

152.4 *i*-C6H5

149.0 6-C5H4N

148.6 *o,m* or *p-*C6F5 1J=226 Hz

144.3 4-C5H4N

138.0 *o,m* or *p-*C6F5 1J=245 Hz

136.8 *o,m* or *p-*C6F5 1J=237 Hz

129.1 *o*-C6H5

127.2 *m-*C6H5

126.2 5-C5H4N

125.2 3-C5H4N

122.8 *p*-C6H5

60.2 NCH2CH2NSi

59.4 C5H4NCH2

49.2 NCH2CH2NSi

32.0 C6H5CH2

0.6 Si(CH3)3

**19F NMR data (282.3 MHz, 298 K, CD2Cl2)**

-131.5 6 F d 3J=20.3 Hz *o*-C6F5

-165.0 3 F t 3J=20.0 Hz *p*-C6F5

-167.9 6 F m 3J=20.3, 20.0 Hz *m*-C6F5

**11B NMR data (160.4 MHz, 298 K, CD2Cl2)**

-10.51 B(C6F5)3

**IR data (KBr plates, Nujol)**

1641 (w), 1612 (w), 1511 (m), 1307 (w), 1259(m), 1213 (w), 1082 (m), 1026 (w),

982 (m), 930 (w), 894 (w), 840 (m), 800 (w), 755 (w), 723 (w), 704 (w), 681 (w),

651 (w), 634 (w), 606 (w), 570 (w), 550 (w), 528 (w) cm-1.
